# Supplementary material for: Non-monotonic cellular responses to heterogeneity in talin protein expression-level
Source: Royal Society of Chemistry journal article supplement (doi:10.1039/c4ib00291a), 2015-01-01
Supplement: c4ib00291a4.xlsx [file c4ib00291a4.xlsx]

## Sheet: Sheet1
Definition of Terms		Definition of object (Cell or CMAC) shape descriptors
CMAC = Integrin-mediated Cell Matrix Adhesion Complex		Eccentricity - Indicatve of Cell or CMAC linearity. (1 - Minor Axis / Major Axis)
Colocalization = Pearson's Correlation Coefficient ( r )		Compactness - Indicative of Cell or CMAC non-roundness. (Perimeter /√(4 Pi Area)
CMAC Lifetime = Time from formation to disassembly of a single CMAC
Variable Class	Spatial Scale	Temporal Scale	Exact Variable Names	General Variable Names	Units	Description
Cell Intensity (Talin)	Cellular	End-point	Cell Talin Mean Intensity	Talin expression-level	Standardized Talin Intensity	Intra-Cell mean talin intensity value, standardized to median of control siRNA cell populations, per exp.
Cell Dynamics	Cellular	Instantaneous	Instantaneous Cell Speed	Cell Speed	mm/h	Displacement distance of Cell center of area between two timepoints,t-1 to t0
Cell Dynamics	Cellular	Cell lifetime	Directional Persistence	Directional Persistence	Dimensionless (0 - 1)	Cell displacement / Cell path length
Cell Morphology	Cellular	Instantaneous	Cell Area	Cell Area	mm2	Segmented Cell area
Cell Morphology	Cellular	Instantaneous	Cell Compactness	Cell Compactness	Dimensionless (≥ 1)	Compactness of the segmented Cell - higher values indicate increasing protrusivity or non-roundess
Cell Morphology	Cellular	Instantaneous	Cell Eccentricity	Cell Eccentricity	Dimensionless (0 - 1)	1-Cell Minor Axis/Cell Major axis; higher values indicate increasing linearity
CMAC Intensity (EGFP-Paxillin)	CMAC Population (per Cell)	Instantaneous	Median [CMAC EGFP-Paxillin Content]	CMAC Paxillin Content	Standardized Intensity	Median (sum of CMAC EGFP-Paxillin intensity per CMAC Area), per Cell
Colocalization	CMAC Population (per Cell)	Instantaneous	Median [CMAC EGFP-Paxillin / RubyRed-LifeAct Colocalization]	CMAC Paxillin-F-actin colocalization	Dimensionless (-1 - 1)	Median intra-CMAC Pearson's correlation coefficient, per Cell
CMAC Dynamics	CMAC Population (per Cell)	Instantaneous	Median [CMAC Δmean EGFP-Paxillin]	Rate of CMAC Paxillin Intensity Change	12-bit intensity/frame	Median rate of CMAC mean EGFP-Paxillin Instensity change, per Cell, t-1 to t0
CMAC Dynamics	CMAC Population (per Cell)	Instantaneous	Median [CMAC ΔArea]	Rate of CMAC Area Change	µm²/frame	Median rate of CMAC Area change, per Cell,t-1 to t0
CMAC Dynamics	CMAC Population (per Cell)	CMAC Lifetime	Mean [CMAC Lifetime] per Cell	CMAC Lifetime	min	Mean CMAC Lifetime per Cell; from formation (first segmentation) to disassembly (last segmentation)
CMAC Dynamics	CMAC Population (per Cell)	Instantaneous	Median [CMAC Speed] per Cell	CMAC Speed	mm/h	Median rate of CMAC displacement (centre of area), per Cell, t-1 to t0
CMAC Localization	CMAC Population (per Cell)	Instantaneous	Median [CMAC Distance from Cell Border]	CMAC Distance from Cell Border	µm	Median distance of CMAC from the Cell Border, per Cell
CMAC Localization	CMAC Population (per Cell)	Instantaneous	[CMAC Number] per Cell	Number of CMACs	Dimensionless (> 1)	Number of CMACs identified with each Cell
CMAC Morphology	CMAC Population (per Cell)	Instantaneous	Median [CMAC Area] per Cell	CMAC Area	mm2	Median CMAC area, per Cell
Variable Class	Spatial Scale	Temporal Scale	Exact Variable Names	General Variable Names	Units	Description
CMAC Morphology	Individual CMAC	Instantaneous	CMAC Area	CMAC Area	mm2	Segmented CMAC area
CMAC Localization	Individual CMAC	Instantaneous	CMAC Distance from Cell Border	CMAC Distance from Cell Border	mm	Distance of CMAC from the Cell Border
CMAC Intensity (EGFP-Paxillin)	Individual CMAC	Instantaneous	CMAC Mean BG-Corrected Intensity-EGFP-Paxillin	CMAC Paxillin	Standardized EGFP-Paxillin Intensity	Intra-CMAC mean EGFP-Paxillin value (background-corrected)
CMAC Intensity (RubyRed-LifeAct)	Individual CMAC	Instantaneous	CMAC Mean BG-Corrected Intensity-RubyRed-LifeAct	CMAC F-actin	Standardized RubyRed-LifeAct Intensity	Intra-CMAC mean RubyRed-LifeAct value (background-corrected)
Colocalization	Individual CMAC	Instantenous	CMAC EGFP-Paxillin / RubyRed-LifeAct Colocalization	CMAC Paxillin-F-actin colocalization	Dimensionless (-1 - 1)	Intra-CMAC Pearson's correlation coefficeint
